# Supplementary material for: Synergetic effects from a high-entropy NASICON-type cathode for advanced sodium-ion batteries
Source: Royal Society of Chemistry journal article supplement (doi:10.1039/d4ta06950a), 2024-01-01
Supplement: d4ta06950a1.pdf [file d4ta06950a1.pdf]

## Supporting information

### **Synergetic Effects from a High-Entropy NASICON-type Cathode for Advanced Sodium-Ion Batteries**

Shouyue Wang, Taiding Xu, Huitao Leng, Shengyu Liang, Wei Zhang, Yuheng Jin, Jingxia Qiu\*,  
Sheng Li\*

*School of Flexible Electronics (Future Technologies), Institute of Advanced Materials (IAM),  
School of Physical and Mathematical Sciences, Nanjing Tech University (NanjingTech), 30 South  
Puzhu Road, Nanjing 211816, China*

Emails: [jxqiu@njtech.edu.cn](mailto:jxqiu@njtech.edu.cn); [iamsli@njtech.edu.cn](mailto:iamsli@njtech.edu.cn)

## Material preparation

All the experimental reagents were analytically pure and can be used directly without further purification. The high-entropy  $\text{Na}_3\text{V}_{1.5}(\text{CrMnFeMgAl})_{0.5}(\text{PO}_4)_3@\text{C}$  cathode material was synthesized by the following method. Typically, 12 mM  $\text{NaH}_2\text{PO}_4\cdot\text{H}_2\text{O}$ , 3 mM  $\text{V}_2\text{O}_5$ , 8 mM citric acid ( $\text{C}_6\text{H}_8\text{O}_7$ ) were weighed and placed in a beaker; 0.4 mM  $\text{Cr}(\text{NO}_3)_3\cdot 9\text{H}_2\text{O}$ ,  $\text{Mn}(\text{CH}_3\text{COO})_2\cdot 4\text{H}_2\text{O}$ ,  $\text{Fe}(\text{NO}_3)_3\cdot 9\text{H}_2\text{O}$ ,  $\text{Mg}(\text{CH}_3\text{COO})_2\cdot 4\text{H}_2\text{O}$ ,  $\text{Al}(\text{NO}_3)_3\cdot 9\text{H}_2\text{O}$  were also added into the beaker, respectively. Next, 30 mL of deionized water was added and stirred magnetically at 70 °C for 3 h to form a homogeneous solution. After that, the mixture was dried in an oven at 120 °C for 12 h to get a gel. Then, the product was ground into powder and heated at 300 °C for 4 h, then 800 °C for 10 h with a heating rate of 5 °C/min in a tube furnace with argon atmosphere. The simple  $\text{Na}_3\text{V}_2(\text{PO}_4)_3@\text{C}$  material was synthesized using the same method for meaningful comparison.

## Material characterizations

The structure of the prepared materials above was characterized by X-ray diffraction (Cu  $\text{K}\alpha$  radiation,  $\lambda=1.5418 \text{ \AA}$ ). The inductively coupled plasma-optical emission spectroscopy (ICP) was used to confirm the elements composition of samples. Scanning electron microscopy (SEM, JSM-7800F) and transmission electron microscopy (TEM, JEM-2100F) were carried out to explore the morphology and microstructure of samples. The mapping of energy-dispersive spectral elements was carried out in TEM mode. X-ray photoelectron spectroscopy (XPS) measurements were carried out on an ESCALB250Xi instrument equipped with a monochromatic Al-K $\alpha$  source. Thermogravimetric analysis (TGA) of the samples was performed to test the carbon content of the sample surface.

## Electrochemical measurements

The slurry of the cathode was composed by mixing the HE-NVMP@C material, Super P, and polyvinylidene fluoride (PVDF) binder with a weight ratio of 7:2:1 in N-methyl-2-pyrrolidone (NMP) and stirred magnetically for 12 h. The stirred slurry was then

evenly coated onto the copper foil and dried in a vacuum oven at 80 °C for 12h. The coated copper foil was cut into electrodes with a diameter of 14 mm. Glass fiber (Grade GF/F, Whatman) and Na metal were used as a separator and counter electrodes, respectively, when assembled into a coin cell (CR2032) in a glovebox at Ar-atmosphere (both O<sub>2</sub> and H<sub>2</sub>O < 0.5 ppm). The battery performance was tested in 1 M NaClO<sub>4</sub> solution in a mixture (1:1, VOL%) of ethylene carbonate (EC) with 5% fluoroethylene carbonate (FEC). A cyclic voltammetry test was carried out through a BioLogic electrochemical workstation. The cycle performances of the cells were tested between 2.5 and 4.3 V (vs. Na/Na<sup>+</sup>) in the galvanostatic model on a battery test system (NEWARE). All electrochemical tests were carried out at room temperature.

### **Annotation**

The crystal structures in this paper (**Figure 1a** and **Figure 1c**) were drawn through VESTA [1].

The XRD Rietveld refinement results in this paper (**Figure 1b** and **Figure S2**) were drawn through EXPGUI[2]

1. K. Momma and F. Izumi, *Journal of Applied Crystallography*, 2011, **44**, 1272-1276.
2. B. H. Toby, *Journal of Applied Crystallography*, 2001, **34**, 210-213.

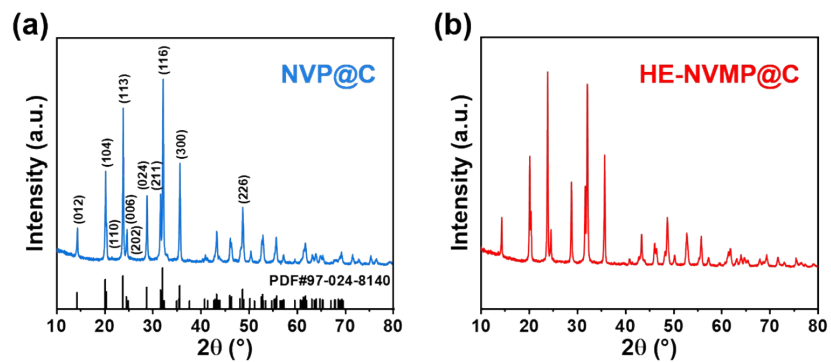

Figure S1. XRD patterns of (a) NVP@C and (b) HE-NVMP@C

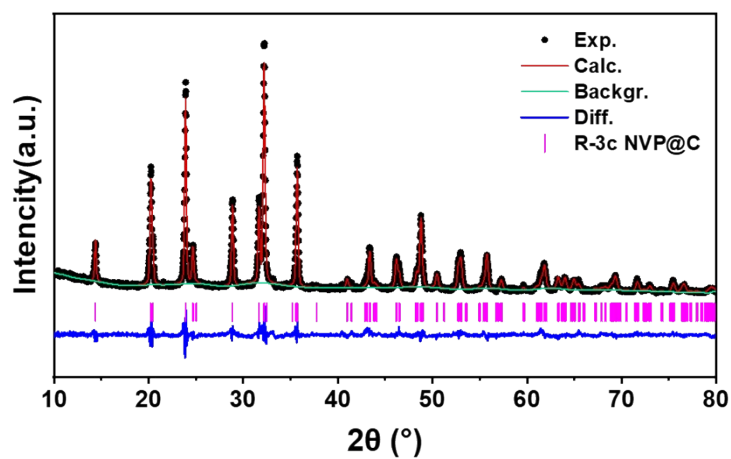

Figure S2. XRD pattern and Rietveld refinement result of the NVP@C.

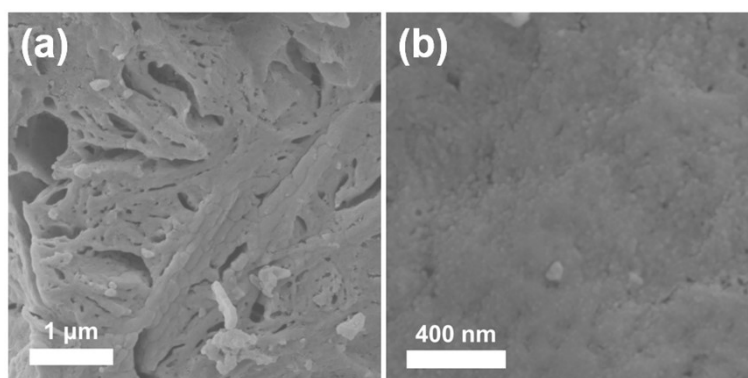

Figure S3. SEM images of the NVP@C sample: (a) Low and (b) High magnifications.

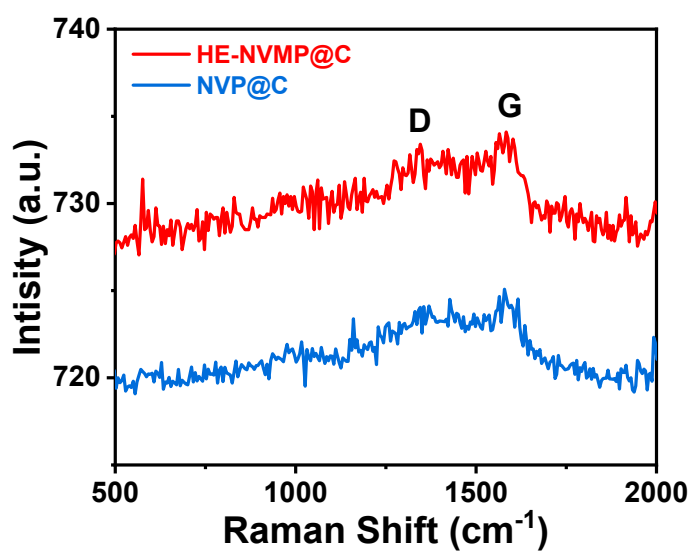

Figure S4. Raman spectra of the samples.

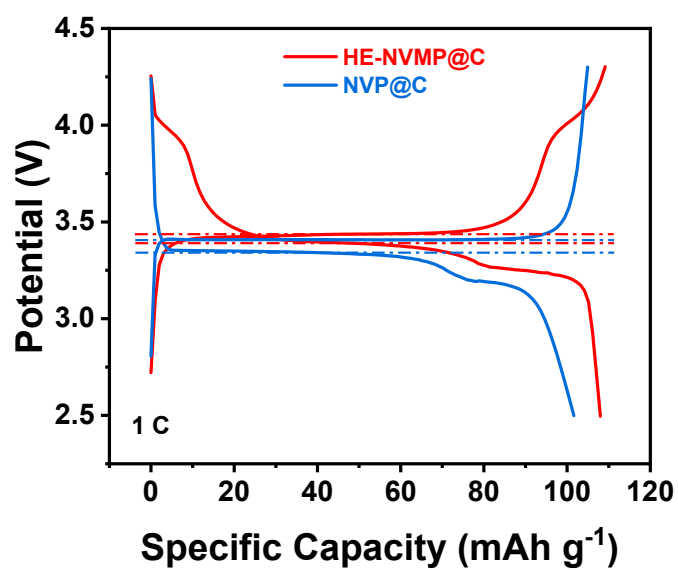

Figure S5. Charge/discharge curves of the samples at a rate of 1 C.

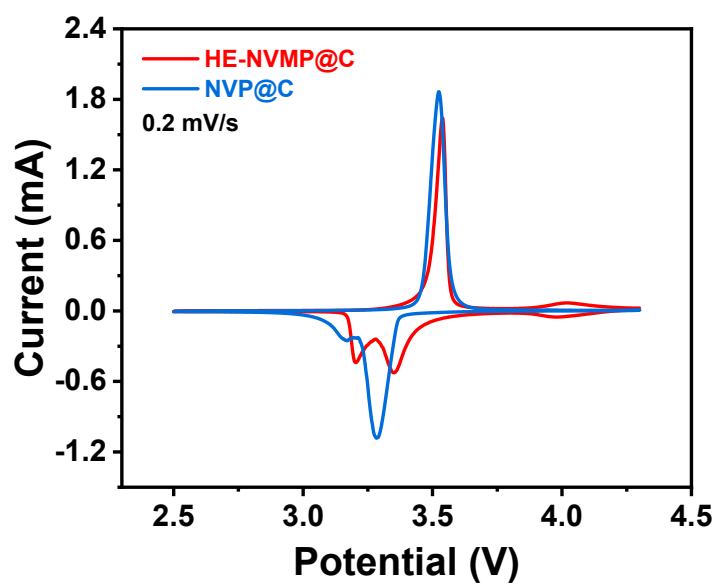

**Figure S6.** CV curves of the cathodes at a scan rate of 0.2 mV/s.

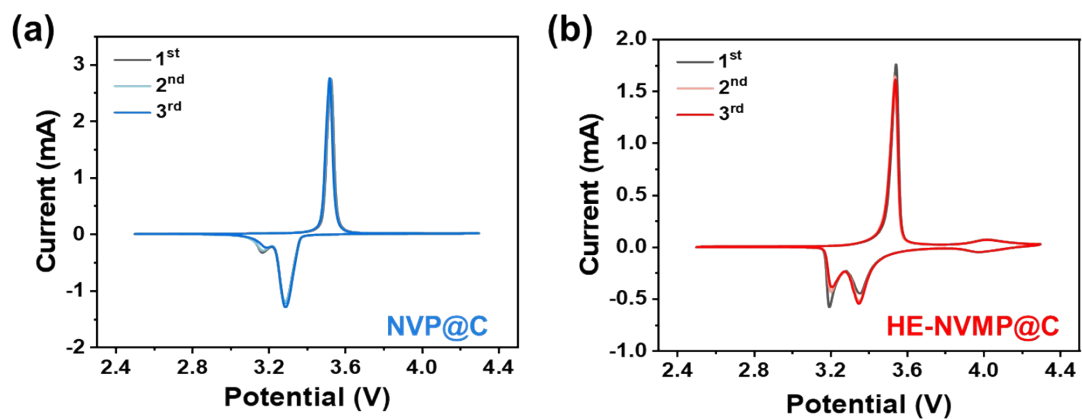

**Figure S7.** The initial three CV curves of the cathodes at a scan rate of 0.2 mV/s.

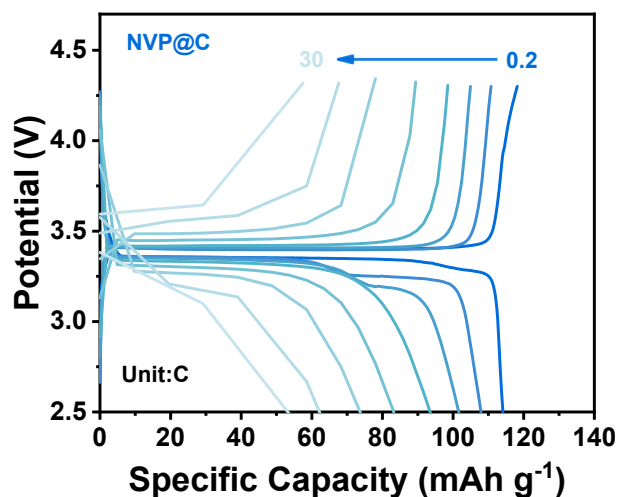

**Figure S8.** Charge/discharge curves of the NVP@C cathode at 0.2, 0.5, 1, 2, 5, 10, 20, and 30 C, respectively.

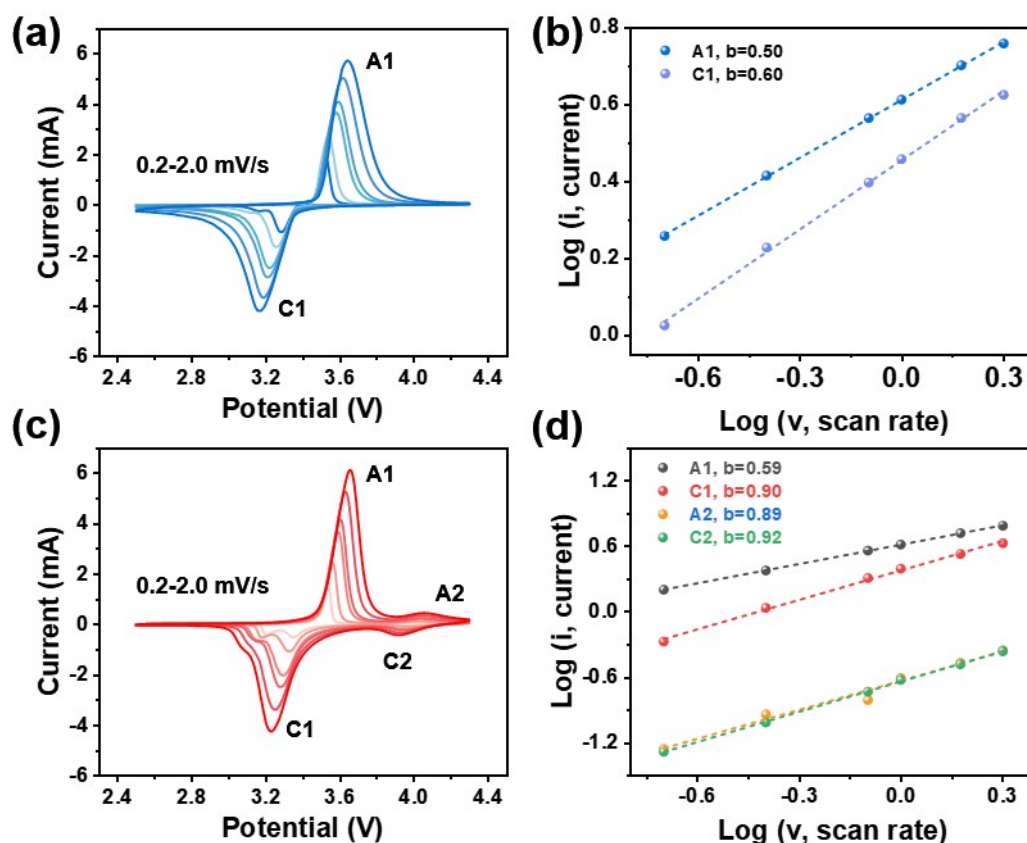

**Figure S9.** CV curves of (a) NVP@C and (c) HE-NVMP@C cathodes at various scan rates. The log (peak current) vs. log (scan rate) plots of (b) NVP@C and (d) HE-NVMP@C cathodes at different charge/discharge states.

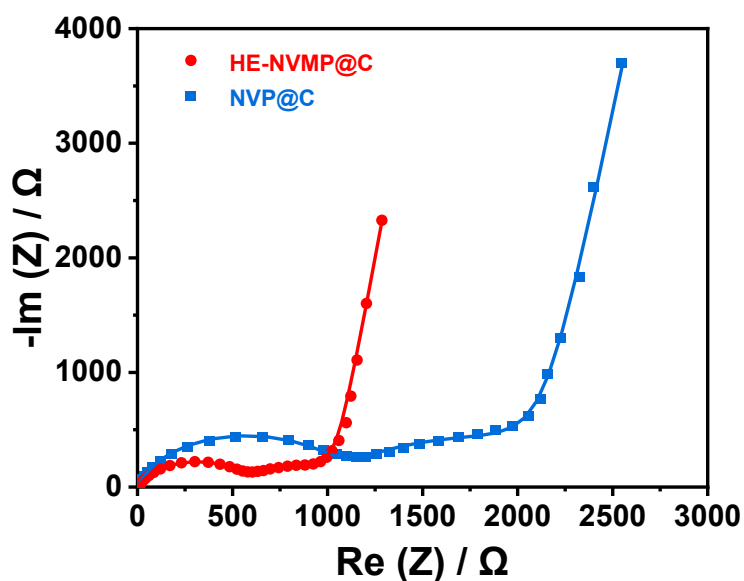

**Figure S10.** The EIS spectra of the samples before cycling test.

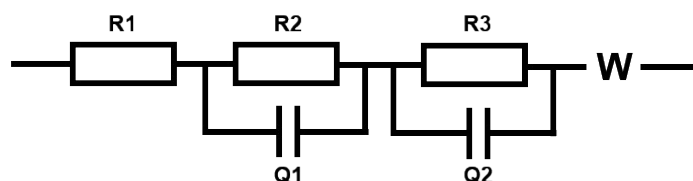

**Figure S11.** The equivalent circuit diagram for impedance fitting.

R1 represents the internal resistance of the battery, including the resistance of the collector, electrolyte, active material, etc.; R2 and R3 represent the SEI resistance and the interfacial transfer resistance; Q1 and Q2 are the corresponding double-electric-layer capacitance, respectively; W represents the Warburg impedance, which is the diffusion impedance of sodium ions in the active material.



**Table S1.** Detailed structure information of HE-NVMP@C from Rietveld refinement from the X-ray powder diffraction pattern.

Na<sub>3</sub>V<sub>1.5</sub>(CrMnFeMgAl)<sub>0.5</sub>(PO<sub>4</sub>)<sub>3</sub>@C sample. Crystal phase: rhombohedral, R-3c; a = b = 8.7295 Å, c = 21.8269 Å, V= 1440.47 Å<sup>3</sup>, R<sub>wp</sub>=9.20%, R<sub>p</sub>=7.00%.

| Atom | x       | y      | z       | Occupancy | Wyckoff Position |
|------|---------|--------|---------|-----------|------------------|
| Na1  | 0.3333  | 0.6667 | 0.1667  | 1.073     | 6b               |
| Na2  | 0.6667  | 0.9697 | 0.0833  | 0.810     | 18e              |
| V    | 0.3333  | 0.6667 | 0.0196  | 0.746     | 12c              |
| Cr   | 0.3333  | 0.6667 | 0.0196  | 0.0471    | 12c              |
| Mn   | 0.3333  | 0.6667 | 0.0196  | 0.0468    | 12c              |
| Fe   | 0.3333  | 0.6667 | 0.0196  | 0.0472    | 12c              |
| Mg   | 0.3333  | 0.6667 | 0.0196  | 0.0417    | 12c              |
| Al   | 0.3333  | 0.1667 | 0.0196  | 0.0365    | 12c              |
| O1   | 0.1459  | 0.4982 | 0.0782  | 1.002     | 36f              |
| O2   | 0.5492  | 0.8473 | -0.0252 | 1.062     | 36f              |
| P    | -0.0410 | 0.3333 | 0.0833  | 0.9867    | 18e              |

**Table S2.** Detailed structure information of NVP@C from Rietveld refinement from the X-ray powder diffraction pattern.

Na<sub>3</sub>V<sub>2</sub>(PO<sub>4</sub>)<sub>3</sub>@C sample. Crystal phase: rhombohedral, R-3c; a = b = 8.7435 Å, c = 21.7563 Å, V= 1440.42 Å<sup>3</sup>, R<sub>wp</sub>=9.0%, R<sub>p</sub>=7.00%

| Atom | x       | y      | z       | Occupancy | Wyckoff Position |
|------|---------|--------|---------|-----------|------------------|
| Na1  | 0.3333  | 0.6667 | 0.1667  | 0.844     | 6b               |
| Na2  | 0.6667  | 0.9681 | 0.0833  | 0.7735    | 18e              |
| V    | 0.3333  | 0.6667 | 0.0194  | 0.9994    | 12c              |
| O1   | 0.1355  | 0.4930 | 0.7827  | 1.0111    | 36f              |
| O2   | 0.5538  | 0.8519 | -0.2674 | 1.0068    | 36f              |
| P    | -0.0426 | 0.3333 | 0.0833  | 0.9800    | 18e              |
